# Supplementary material for: Methylation of all BRCA1 copies predicts response to the PARP inhibitor rucaparib in ovarian carcinoma
Source: PubMed Central journal article supplement (PMC6162272; doi:10.1038/s41467-018-05564-z), 2018-09-28
Supplement: 41467_2018_5564_MOESM3_ESM.pdf [file 41467_2018_5564_MOESM3_ESM.pdf]

## Description of Additional Supplementary Files

### File Name: Supplementary Data 1

**Description:** Potentially pathogenic copy number alterations, rearrangements and short variants reported by the Foundation Medicine T5a test in HGSOC PDX.

### File Name: Supplementary Data 2

**Description:** Dose response observed in nine independent HGSOC PDX to rucaparib in vivo (150mg kg<sup>-1</sup>, 300mg kg<sup>-1</sup> and 450mg kg<sup>-1</sup>).

### File Name: Supplementary Data 3

**Description:** Re-sequencing of chemo-naïve, cisplatin and rucaparib treated PDX samples from four *BRCA1/2*-mutant HGSOC for secondary mutations.

### File Name: Supplementary Data 4

**Description:** Summary of *BRCA1* promoter methylation detected by MS-ddPCR in the archival chemo-naïve and post-treatment tumor samples in four *BRCA1*-methylated HGSOC (#11, #62, #48, #169).

### File Name: Supplementary Data 5

**Description:** Zygosity status of *BRCA1* promoter methylation in HGSOC in relation to response to rucaparib treatment in the ARIEL2 Part 1 clinical trial.

### File Name: Supplementary Data 6

**Description:** List of genes analysed by BROCA v6 assay.
